# Supplementary material for: Significant water vapor fluxes from the Greenland Ice Sheet detectedthrough water vapor isotopic (δ&lt;sup&gt;18&lt;/sup&gt;O, δD, deuterium excess) measurements
Source: Copernicus journal article supplement (doi:10.5194/tc-2020-276), 2020-10-28
Supplement: Supplementary file 1 [file tc-2020-276-supplement.pdf]

## S1 Supplemental Figures

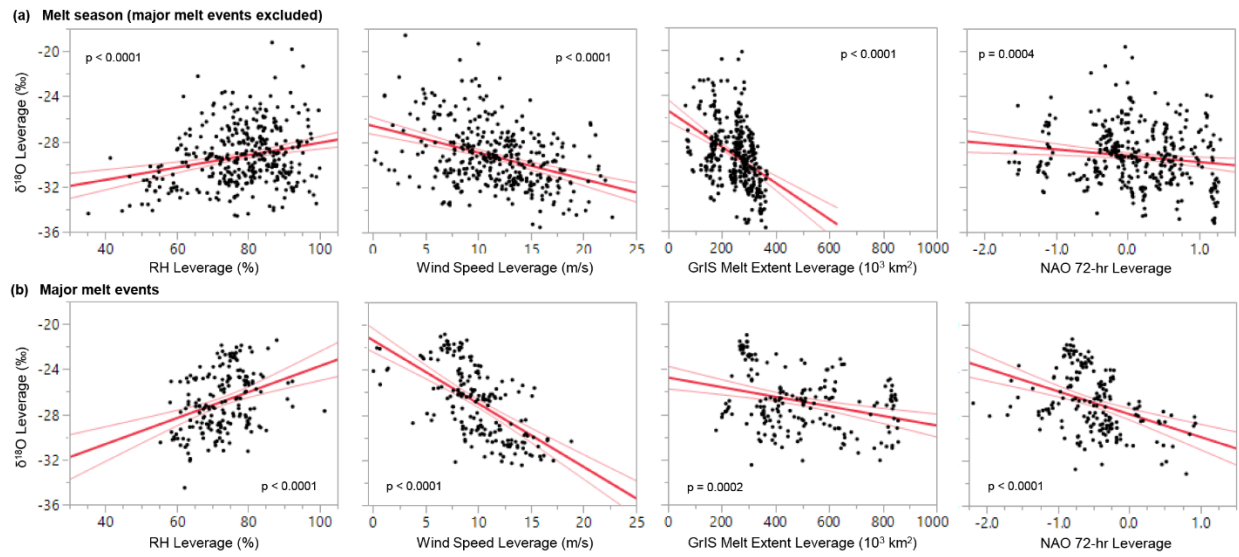

**Figure S1: Leverage plots (Sall, 1990) for multiple regressions of hourly  $\delta^{18}\text{O}$  against hourly THU\_L relative humidity (RH) and wind speed, past 24-hour GrIS melt extent, the past 72-hour NAO index for (a) the melt season excluding melt events and (b) only times during melt events. Thick red line represents best line of fit for each partial regression, and thin red lines are the 0.05 significance curves. The regressions yield overall  $r^2$  and p values of 0.28, <0.0001 and 0.42, <0.0001 for a and b, respectively.**
